# Supplementary material for: Morphology-driven ionic pathway engineering in CuCo 2 O 4 /carbon nanotubes for high diffusion hybrid supercapacitors across diverse electrolyte conditions
Source: Royal Society of Chemistry journal article supplement (doi:10.1039/d5na00916b), 2025-12-18
Supplement: d5na00916b1.pdf [file d5na00916b1.pdf]

## Supporting information

### Experimental section

#### Materials

| Material                   | Formula                                                | Quantity | Source          | Purity grade |
|----------------------------|--------------------------------------------------------|----------|-----------------|--------------|
| Copper nitrate trihydrate  | (Cu(NO <sub>3</sub> ) <sub>2</sub> ·3H <sub>2</sub> O) | 1.46 g   | Sigma Aldrich   | 98.9 %       |
| Cobalt nitrate hexahydrate | (Co(NO <sub>3</sub> ) <sub>2</sub> ·6H <sub>2</sub> O) | 3.53 g   | Sigma Aldrich   | 98.9 %       |
| Ethylene glycol            | C <sub>2</sub> H <sub>6</sub> O <sub>2</sub>           | 5 mL     | MERCK           | 99.5 %       |
| Ethanol                    | C <sub>2</sub> H <sub>5</sub> OH                       | 30 mL    | Sigma Aldrich   | 99.9 %       |
| Urea                       | (NH <sub>2</sub> ) <sub>2</sub> CO                     | 2.18 g   | Honywell        | 99.5 %       |
| Ammonium fluoride          | NH <sub>4</sub> F                                      | 0.97 g   | Duksan Reagents | 99.0 %       |
| Dimethylformamide          | C <sub>3</sub> H <sub>7</sub> NO                       | 15 mL    | Honywell        | 99.8 %       |
| Hydrochloric acid          | HCl                                                    | 37 mL    | MERCK           | 97 %         |

We have taken 5 g of CCO to prepare the following three composites, each of 200 mg; the measured mass of CNTs is given below:

CCO with 5% CNTs = 0.010 g

CCO with 10% CNTs = 0.020 g

CCO with 15% CNTs = 0.030 g

Active mass area ( $1.5 \times 1 \text{ cm}^2$ )

## **Electrochemical characterizations setup**

A 3-electrode setup of the Corrtest Electrochemical and Corrosion Studio (version, 6.4) was utilized to evaluate the EC performance. For the reference electrode (RE) and CE, an Ag/AgCl electrode and a platinum wire were used, respectively, and the WE was made from the synthesized material and submerged in an electrolyte solution containing 1 M KOH. A 2-electrode setup, comprising CCO/CNTs as the positive electrode and AC as the negative electrode, was used for GITT analysis.

## **Results and discussion**

### **Galvanostatic charge-discharge analysis**

The left side of the figure shows the experimental setup used for GCD measurements, which was based on a 3-electrode configuration. First, all electrodes (WE, RE, and CE) were immersed in a 1 M KOH electrolyte, and the experimental parameters were then defined. After that, the experiment was performed for all optimized  $I_m$ , and the corresponding GCD curves were obtained. On the right side of the figure, a magnified view of the EC cell is shown. Before adding CNTs, the transport of electrons and ions was mainly diffusive, which offered resistance and limited the number of electrons reaching the CE. However, after incorporating the CNTs, the transportation of the electrons became nearly ballistic (resistance-free), allowing a large number of electrons to reach the CE and thereby enhancing the EC performance.

**Table S1.** A comparative analysis of the EC performance of CCO electrodes based on a literature review.

| Material        | Morphology                              | Specific capacitance/<br>Capacity | Energy density      | Cyclic stability                | Diffusion coefficient                                    | Ref.             |
|-----------------|-----------------------------------------|-----------------------------------|---------------------|---------------------------------|----------------------------------------------------------|------------------|
| CCO@rGO         | Nanoparticles                           | 380 C/g                           | 20.6 Wh/kg          | 98% after 10k cycles            | NA                                                       | 22               |
| CCO             | Spherical nanoparticles                 | 764.5 mAh/g                       | 25.5 Wh/kg          | 95.5% after 2k cycles           | NA                                                       | 30               |
| CCO/MWCNTs      | Nanoplates                              | 1054 F/g                          | NA                  | NA                              | NA                                                       | 31               |
| CCO/CuO         | Hexagonal plate-like                    | 892 F/g                           | NA                  | 94% after 5k cycles             | NA                                                       | 32               |
| CCO/CuO/CNTs    | Hierarchical flower-like                | 1084 F/g                          | NA                  | 98% after 9k cycles             | NA                                                       | 33               |
| CCO/CuO/rGO     | Core-shell nanostructure                | NA                                | 37 Wh/kg            | 83.5% after 4k cycles           | NA                                                       | 52               |
| CCO/MWCNTs      | 3D microspheres                         | 860 F/g                           | NA                  | NA                              | NA                                                       | 53               |
| <b>CCO/CNTs</b> | <b>Semi-spherical and nanorods like</b> | <b>1702.01 C/g</b>                | <b>113.46 Wh/kg</b> | <b>99.94% after 4500 cycles</b> | <b><math>3.9 \times 10^{-11}</math> cm<sup>2</sup>/s</b> | <b>This work</b> |

## References

- [22] Semerci, F.; & Eşgin, H. Step-wise synthesis of mesoporous  $\text{CuCo}_2\text{O}_4$ @reduced graphene oxide composites for supercapacitor applications. *Journal of Electroanalytical Chemistry* **2024**, 970, 118550.
- [30] BoopathiRaja, R.; Parthibavarman, M.; & Begum, A. N. Hydrothermal induced novel  $\text{CuCo}_2\text{O}_4$  electrode for high-performance supercapacitor applications. *Vacuum* **2019**, 165, 96-104.
- [31] Bhagwan, J.; & Han, J. I.  $\text{CuCo}_2\text{O}_4$  nanoplates anchored to multiwall carbon nanotubes as an enhanced supercapacitive performance. *Journal of Energy Storage* **2023**, 62, 106923.
- [32] Arulkumar, C.; Gandhi, R.; Alshgari, R. A.; & Vadivel, S. Improved electrochemical performances of  $\text{CuCo}_2\text{O}_4/\text{CuO}$ -based asymmetric device with ultrahigh capacitance and attractive cycling performance. *Journal of Energy Storage* **2024**, 92, 112202.
- [33] Liu, Y.; Chang, X.; Wang, M.; Guo, H.; Li, W.; & Wang, Y. Hierarchical  $\text{CuCo}_2\text{O}_4/\text{CuO}$  nanoflowers crosslinked with carbon nanotubes as an advanced electrode for supercapacitors. *Journal of Alloys and Compounds* **2021**, 871, 159555.
- [52] Kamble, G. P.; Rasal, A. S.; Gaikwad, S. B.; Gurav, V. S.; Chang, J. Y.; Kolekar, S. S.; & Ghule, A. V.  $\text{CuCo}_2\text{O}_4$  nanorods coated with CuO nanoneedles for supercapacitor applications. *ACS Applied Nano Materials* (**2021**), 4, 12702-12711.
- [53] Abbas, W.; Irfan, M.; Babur, M.; Mazhar, M. E.; Ahmad, J.; Rao, K. A.; & Imran, M. Synergistic  $\text{CuCo}_2\text{O}_4/\text{MWCNT}$  nanocomposites: advanced electrode materials for energy storage and catalysis applications. *Journal of Materials Science: Materials in Engineering* (**2025**), 20, 96.
